# Supplementary material for: Rapid and Highly Sensitive Detection of Lead Ions in Drinking Water Based on a Strip Immunosensor
Source: Sensors (Basel). 2013 Mar 28;13(4):4214–24. doi: 10.3390/s130404214 (PMC3673080; doi:10.3390/s130404214)
Supplement: Supplementary file 1 [file sensors-13-04214-s001.pdf]

*Supplementary Information***Rapid and Highly Sensitive Detection of Lead Ions in Drinking Water Based on a Strip Immunosensor.  
*Sensors* 2013, 13, 4214–4224****Hua Kuang \*, Changrui Xing, Changlong Hao, Liqiang Liu, Libing Wang and Chuanlai Xu**

School of Food Science & Technology, State Key Laboratory of Food Science & Technology, Jiangnan University, Wuxi 214122, China; E-Mails: da\_rui12345@163.com (C.X.); changlongup@163.com (C.H.); raxray@gmail.com (L.L.); wanglb1@126.com (L.W.); xcl@jiangnan.edu.cn (C.X.)

\* Author to whom correspondence should be addressed; E-Mail: khecho@163.com; Tel.: +86-510-8532-9076.

**Figure S1.** TEM pictures of typical gold nanoparticles of 10 nm (**top**) and 30 nm (**bottom**) in diameter.

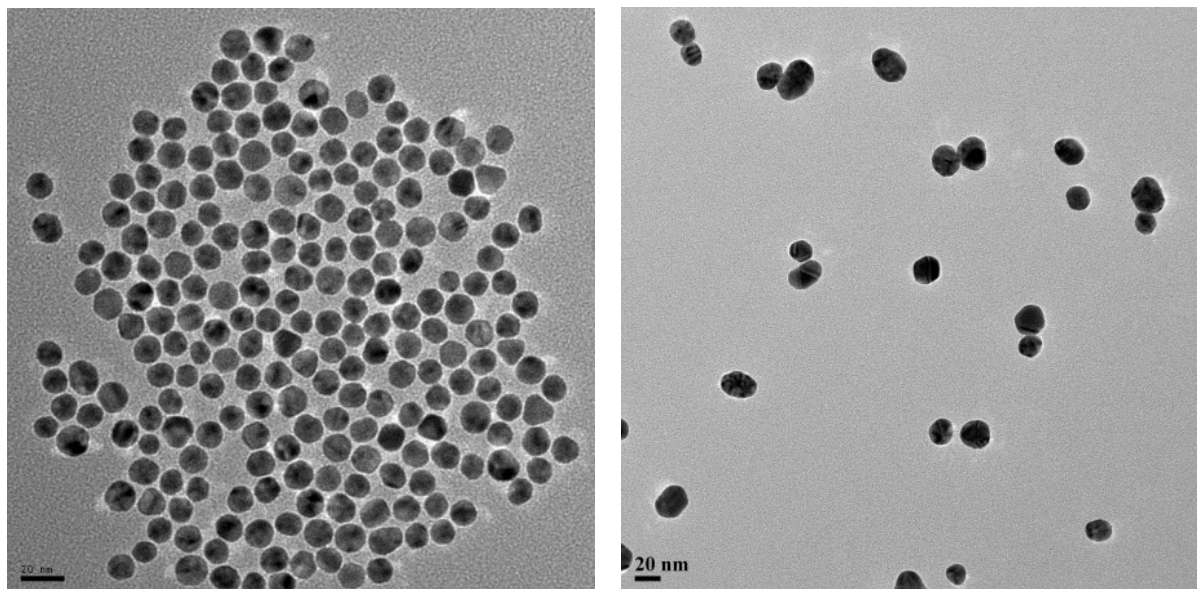

**Figure S2.** Standard inhibition curve of indirect competitive ELISA.

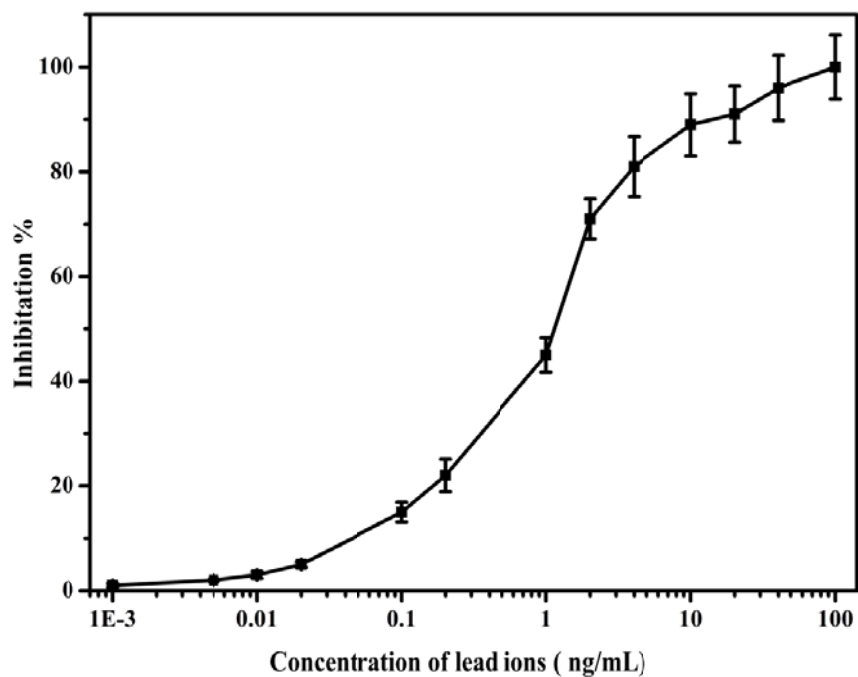

**Figure S3.** Typical photo images of detection results of the conventional method (**top**) and the amplified method (**bottom**) with no analyte.

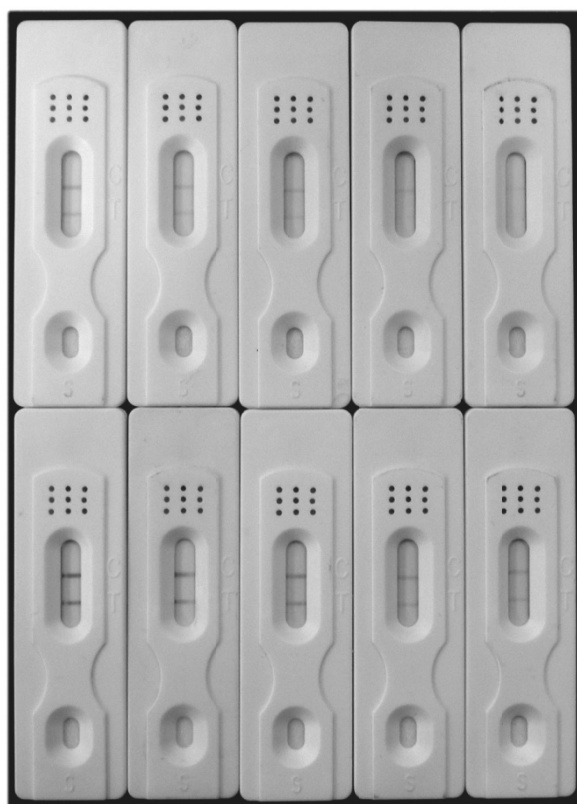

**Table S1.** Recovery test of lead ions in drinking water samples.

| <b>Drinking<br/>Water<br/>Samples</b> | <b>Original<br/>Concentration <sup>a</sup><br/>(ng/mL)</b> | <b>Spiked<br/>Concentration<br/>(ng/mL)</b> | <b>Detected Concentrations<br/>(Mean <math>\pm</math> SD, n = 3)<br/>(ng/mL)</b> | <b>Recovery (%)<br/>(Mean <math>\pm</math> SD,<br/>n = 3)</b> |
|---------------------------------------|------------------------------------------------------------|---------------------------------------------|----------------------------------------------------------------------------------|---------------------------------------------------------------|
| 1                                     | 1.2                                                        | 0.25                                        | 1.44 $\pm$ 0.020                                                                 | 97.3 $\pm$ 8.3                                                |
| 2                                     | 1.2                                                        | 0.5                                         | 1.68 $\pm$ 0.043                                                                 | 96 $\pm$ 8.7                                                  |
| 3                                     | 1.2                                                        | 1                                           | 2.17 $\pm$ 0.088                                                                 | 97 $\pm$ 8.8                                                  |
| 4                                     | 1.2                                                        | 2                                           | 3.27 $\pm$ 0.19                                                                  | 103 $\pm$ 9.6                                                 |

<sup>a</sup> Original concentrations were detected by ICP-MS.

© 2013 by the authors; licensee MDPI, Basel, Switzerland. This article is an open access article distributed under the terms and conditions of the Creative Commons Attribution license (<http://creativecommons.org/licenses/by/3.0/>).
